# Supplementary material
Source: PubMed Central journal article supplement (PMC6320248)
Supplement: NIHMS984651-supplement-Supplemental_Tables_1_to_3.pdf [file NIHMS984651-supplement-Supplemental_Tables_1_to_3.pdf]

In the format provided by the authors and unedited.

# Disruption of *TET2* promotes the therapeutic efficacy of CD19-targeted T cells

Joseph A. Fraietta<sup>1,2,3,4</sup>, Christopher L. Nobles<sup>5</sup>, Morgan A. Sammons<sup>6,10</sup>, Stefan Lundh<sup>1,2</sup>, Shannon A. Carty<sup>2,11</sup>, Tyler J. Reich<sup>1,2</sup>, Alexandria P. Cogdill<sup>1,2</sup>, Jennifer J. D. Morrisette<sup>3</sup>, Jamie E. DeNizio<sup>7,8</sup>, Shantanu Reddy<sup>5</sup>, Young Hwang<sup>5</sup>, Mercy Gohil<sup>1,2</sup>, Irina Kulikovskaya<sup>1,2</sup>, Farzana Nazimuddin<sup>1,2</sup>, Minnal Gupta<sup>1,2</sup>, Fang Chen<sup>1,2</sup>, John K. Everett<sup>5</sup>, Katherine A. Alexander<sup>6</sup>, Enrique Lin-Shiao<sup>6</sup>, Marvin H. Gee<sup>9</sup>, Xiaojun Liu<sup>1,2</sup>, Regina M. Young<sup>1,2</sup>, David Ambrose<sup>1,2</sup>, Yan Wang<sup>1,2</sup>, Jun Xu<sup>1,2</sup>, Martha S. Jordan<sup>2,3</sup>, Katherine T. Marcucci<sup>1,2</sup>, Bruce L. Levine<sup>1,2,3</sup>, K. Christopher Garcia<sup>9</sup>, Yangbing Zhao<sup>1,2</sup>, Michael Kalos<sup>1,2,3</sup>, David L. Porter<sup>1,2,7</sup>, Rahul M. Kohli<sup>5,7,8</sup>, Simon F. Lacey<sup>1,2,3</sup>, Shelley L. Berger<sup>6</sup>, Frederic D. Bushman<sup>5</sup>, Carl H. June<sup>1,2,3,4\*</sup> & J. Joseph Melenhorst<sup>1,2,3,4\*</sup>

<sup>1</sup>Center for Cellular Immunotherapies, Perelman School of Medicine, University of Pennsylvania, Philadelphia, PA, USA. <sup>2</sup>Abramson Cancer Center, Perelman School of Medicine, University of Pennsylvania, Philadelphia, PA, USA. <sup>3</sup>Pathology and Laboratory Medicine, Perelman School of Medicine, University of Pennsylvania, Philadelphia, PA, USA. <sup>4</sup>Parker Institute for Cancer Immunotherapy, University of Pennsylvania, Philadelphia, PA, USA. <sup>5</sup>Department of Microbiology, Perelman School of Medicine, University of Pennsylvania, Philadelphia, PA, USA. <sup>6</sup>Department of Cell and Developmental Biology, Epigenetics Program, Perelman School of Medicine, University of Pennsylvania, Philadelphia, PA, USA. <sup>7</sup>Department of Medicine, Perelman School of Medicine, University of Pennsylvania, Philadelphia, PA, USA. <sup>8</sup>Department of Biochemistry and Biophysics, Perelman School of Medicine, University of Pennsylvania, Philadelphia, PA, USA. <sup>9</sup>Department of Molecular and Cellular Physiology, Stanford University School of Medicine, Stanford, CA, USA. <sup>10</sup>Present address: Department of Biology, University at Albany, State University of New York, Albany, NY, USA. <sup>11</sup>Present address: Department of Internal Medicine and Rogel Cancer Center, University of Michigan, Ann Arbor, MI, USA. \*e-mail: [cjune@upenn.edu](mailto:cjune@upenn.edu); [mej@upenn.edu](mailto:mej@upenn.edu)

**Supplementary Table 1: Patient-10 baseline characteristics and CTL019 treatment information.**

| Age/Sex                                                                                                                                                                                                                                                      | CLL Characteristics                | CLL Involvement at Baseline                                                                    | Previous Therapies                                                                                                                                                                                                                                                         | CTL019 Treatment Information                                                                                                                                                                                                 |
|--------------------------------------------------------------------------------------------------------------------------------------------------------------------------------------------------------------------------------------------------------------|------------------------------------|------------------------------------------------------------------------------------------------|----------------------------------------------------------------------------------------------------------------------------------------------------------------------------------------------------------------------------------------------------------------------------|------------------------------------------------------------------------------------------------------------------------------------------------------------------------------------------------------------------------------|
| 78/Male                                                                                                                                                                                                                                                      | ATM deletion (del); del11q; del17p | 85% of marrow; bulky adenopathy with the largest mass in the mesentary measuring 13.5 × 6.8 cm | Rituxan-CVP* ×6 cycles<br>Rituxan Alone<br>Fludarabine/Rituxan; Excellent Partial Response<br>Chlorambucil; Progression<br>Bendamustine ×1 cycle; Progression<br>CHOP** ×8 cycles<br>PCR <sup>±</sup> with stable to mild progression on PET/CT <sup>‡</sup> 2 weeks later | Lymphodepleting chemotherapy given prior to CTL019 cell infusion: pentostatin/cyclophosphamide<br><br>2 adoptive transfers of 3.75 × 10 <sup>8</sup> and 5.61 × 10 <sup>8</sup> autologous CTL019 cells (82% CD4+; 18% CD8+) |
| <p>*cyclophosphamide, vincristine and prednisolone</p> <p>**cyclophosphamide, doxorubicin, vincristine and prednisone</p> <p><sup>±</sup>pentostatin, cyclophosphamide and rituximab</p> <p><sup>‡</sup>positron emission tomography–computed tomography</p> |                                    |                                                                                                |                                                                                                                                                                                                                                                                            |                                                                                                                                                                                                                              |

**Supplementary Table 2: Tumor burden evaluated by IgH deep sequencing analysis of peripheral blood and bone marrow from Patient-10.**

| Sample Information |                             |                              | IgH Repertoire Assessment |                        |                                |                                  |                                    | Tumor Clone                         |                                             |                                               |
|--------------------|-----------------------------|------------------------------|---------------------------|------------------------|--------------------------------|----------------------------------|------------------------------------|-------------------------------------|---------------------------------------------|-----------------------------------------------|
| Sample Type        | First Infusion <sup>1</sup> | Second Infusion <sup>2</sup> | Entropy <sup>3</sup>      | Clonality <sup>4</sup> | Max Frequency (%) <sup>5</sup> | Gene Rearrangements <sup>6</sup> | Fraction of Nucleated <sup>7</sup> | Estimated # of Genomes <sup>8</sup> | Log Reduction (First Infusion) <sup>9</sup> | Log Reduction (Second Infusion) <sup>10</sup> |
| Peripheral Blood   | -29                         |                              | 0.078583                  | 0.990387               | 99.4                           | 110710                           | 0.343804                           | 109271                              |                                             |                                               |
|                    | 14                          |                              | 0.067824                  | 0.991416               | 99.46                          | 157699                           | 0.321995                           | 156371                              | 0.028                                       |                                               |
|                    | 28                          |                              | 0.164639                  | 0.967638               | 98.13                          | 10303                            | 0.025852                           | 10034                               | 1.124                                       |                                               |
|                    | 63                          | -7                           | 0.154459                  | 0.973519               | 98.33                          | 60725                            | 0.11781                            | 59601                               | 0.465                                       |                                               |
|                    | 69                          | -1                           | 0.149261                  | 0.971558               | 98.31                          | 47691                            | 0.132377                           | 46809                               | 0.415                                       |                                               |
|                    | 84                          | 14                           | 0.152248                  | 0.97316                | 98.34                          | 115697                           | 0.176816                           | 113715                              | 0.289                                       | -0.176                                        |
|                    | 121                         | 51                           | 0.096938                  | 0.978857               | 98.93                          | 5126                             | 0.014364                           | 5011                                | 1.379                                       | 0.965                                         |
|                    | 147                         | 77                           | 1.479932                  | 0.260034               | 15.07                          | 22                               | 0                                  | 0                                   | 5.499                                       | 5.084                                         |
|                    | 259                         | 189                          | 2.613258                  | 0.175609               | 14.98                          | 40                               | 0                                  | 0                                   | 5.532                                       | 5.117                                         |
|                    | 351                         | 281                          | 2.613371                  | 0.213297               | 15.02                          | 60                               | 0                                  | 0                                   | 5.532                                       | 5.117                                         |
|                    | 526                         | 456                          | 2.278436                  | 0.240522               | 16.07                          | 39                               | 0                                  | 0                                   | 5.503                                       | 5.088                                         |
|                    | 619                         | 549                          | 1.829257                  | 0.348405               | 13.84                          | 54                               | 0                                  | 0                                   | 5.491                                       | 5.076                                         |
|                    | 710                         | 640                          | NA                        | NA                     | 38.33                          | 12                               | 0                                  | 0                                   | 5.528                                       | 5.113                                         |
| 1177               | 1107                        | 2.611971                     | 0.213718                  | 12.09                  | 69                             | 0                                | 0                                  | 5.479                               | 5.065                                       |                                               |
| Bone Marrow        | 101                         | 31                           | 0.015523                  | 0.997597               | 99.79                          | 139042                           | 0.301654                           | 138663                              | NA                                          |                                               |
|                    | 442                         | 372                          | 2.336592                  | 0.167689               | 11.21                          | 31                               | 0                                  | 0                                   | 5.458                                       |                                               |
|                    | 801                         | 731                          | 1.351141                  | 0.32443                | 17.71                          | 16                               | 0                                  | 0                                   | 5.247                                       |                                               |

<sup>1</sup>Day relative to first infusion; <sup>2</sup>Day relative to second infusion; <sup>3</sup>Shannon's entropy, a measure of the shape of the distribution of the read counts with a low entropy denoting a clonal sample composition; <sup>4</sup>Clonality= 1-(entropy/Log<sub>2</sub> productive unique rearrangements). Clonality ranges from 0-1 with 1 denoting a clonal and 0 a polyclonal sample; <sup>5</sup>Maximum frequency for each sample; <sup>6</sup>The number of unique IgH rearrangements; <sup>7</sup>The proportion the leukemic clone makes up of the total genomic mass of all input B-cells; <sup>8</sup>The estimated number of diploid genomes (or cells) with this leukemia rearrangement; <sup>9</sup>Log<sub>10</sub> reduction of the leukemic clonotype relative to the baseline sample; <sup>10</sup>Log<sub>10</sub> reduction relative to the second infusion baseline sample; NA, Not available

**Supplementary Table 3: Summary statistics for ATAC-seq of Patient-10 CD8+ CAR+ and CD8+ CAR- T-cells.**

| <b>Sample Name</b>              | <b>Nextera Index</b> | <b>Total Reads (paired-end 2 × 75 bp)</b> | <b>Unique Concordant Alignment #</b> | <b>% Aligned Concordantly</b> |
|---------------------------------|----------------------|-------------------------------------------|--------------------------------------|-------------------------------|
| CD8+ CAR+ T-cells (Replicate 1) | CAGAGAGG             | 98,139,264                                | 89,411,351                           | 91.1                          |
| CD8+ CAR+ T-cells (Replicate 2) | CTCTCTAC             | 78,513,260                                | 75,702,498                           | 96.4                          |
| CD8+ CAR- T-cells (Replicate 1) | GGACTCCT             | 220,099,187                               | 204,644,381                          | 93.0                          |
| CD8+ CAR- T-cells (Replicate 2) | TAGGCATG             | 98,975,732                                | 91,325,785                           | 92.3                          |
